# Supplementary material for: Optical properties of organic haze analogues in water-rich exoplanet atmospheres observable with JWST
Source: Springer Nature journal article supplement (doi:10.1038/s41550-023-02140-4), 2023-11-27
Supplement: 41550_2023_2140_MOESM1_ESM.pdf [file 41550_2023_2140_MOESM1_ESM.pdf]

---

# Optical properties of organic haze analogues in water-rich exoplanet atmospheres observable with JWST

---

In the format provided by the authors and unedited

---

## **Table of Contents**

|                             |    |
|-----------------------------|----|
| Supplementary Table 1.....  | 2  |
| Supplementary Table 2.....  | 3  |
| Supplementary Table 3.....  | 5  |
| Supplementary Figure 1..... | 6  |
| Supplementary Figure 2..... | 7  |
| Supplementary Figure 3..... | 8  |
| Supplementary Figure 4..... | 9  |
| Supplementary Figure 5..... | 10 |
| Supplementary Figure 6..... | 11 |

**Supplementary Table 1.** The density and elemental compositions of the two haze analogues in this study with their initial gas compositions. The results for PHAZER produced Titan, Triton, and Pluto haze analogues are listed for comparison.<sup>18,31</sup>

|                               | Particle density<br>(g cm <sup>-3</sup> ) | Elemental<br>compositions                                        | Initial gases                                                                                                                |
|-------------------------------|-------------------------------------------|------------------------------------------------------------------|------------------------------------------------------------------------------------------------------------------------------|
| 400 K<br>(Exoplanet)          | 1.262                                     | C: 56%±2.5%<br>H: 6.1%±0.2%<br>N: 21.1%±0.5%<br>O: 17%±3.2%      | 56% H <sub>2</sub> O<br>11% CH <sub>4</sub><br>10% CO <sub>2</sub><br>6.4% N <sub>2</sub><br>1.9% H <sub>2</sub><br>14.7% He |
| 300 K<br>(Exoplanet)          | 1.328                                     | C: 51%±1.2%<br>H: 6.1%±0.1%<br>N: 27.1%±0.7%<br>O: 15%±2.0%      | 66% H <sub>2</sub> O<br>6.6% CH <sub>4</sub><br>6.5% N <sub>2</sub><br>4.9% CO <sub>2</sub><br>16% He                        |
| 100 K<br>(Titan/Triton/Pluto) | 1.343-1.424                               | C: 49.6-46.2%*<br>H: 5.6-5.3%*<br>N: 42.5-39.8%*<br>O: 2.2-8.6%* | 95-90% N <sub>2</sub><br>5% CH <sub>4</sub><br>0-5% CO                                                                       |

\*Error bars are 0.5% for elemental compositions from replicate runs

**Supplementary Table 2.** The haze parameters used in the atmospheric transmission spectra simulation for Fig.4. in the main text.

|                                              | Water-rich haze<br>400 K |                | Water-rich haze<br>300 K | Titan haze analogue |
|----------------------------------------------|--------------------------|----------------|--------------------------|---------------------|
|                                              | Diameter/nm              | Distribution/% | Same as 400 K haze       | Same as 400 K haze  |
| Particles size<br>distribution <sup>76</sup> | 31                       | 0.00111044     |                          |                     |
|                                              | 32                       | 0.00222089     |                          |                     |
|                                              | 33                       | 0.00444178     |                          |                     |
|                                              | 34                       | 0.00777311     |                          |                     |
|                                              | 35                       | 0.01110445     |                          |                     |
|                                              | 36                       | 0.01887756     |                          |                     |
|                                              | 37                       | 0.03331335     |                          |                     |
|                                              | 38                       | 0.05552224     |                          |                     |
|                                              | 39                       | 0.09994004     |                          |                     |
|                                              | 40                       | 0.16656673     |                          |                     |
|                                              | 41                       | 0.33313345     |                          |                     |
|                                              | 42                       | 0.55522242     |                          |                     |
|                                              | 43                       | 0.82172918     |                          |                     |
|                                              | 44                       | 1.22148933     |                          |                     |
|                                              | 45                       | 1.71008506     |                          |                     |
|                                              | 46                       | 2.29862083     |                          |                     |
|                                              | 47                       | 2.97599218     |                          |                     |
|                                              | 48                       | 3.48679681     |                          |                     |
|                                              | 49                       | 3.99760144     |                          |                     |
|                                              | 50                       | 4.27521265     |                          |                     |
|                                              | 51                       | 4.41957048     |                          |                     |
|                                              | 52                       | 4.49730162     |                          |                     |
|                                              | 53                       | 4.51951052     |                          |                     |
|                                              | 54                       | 4.50840607     |                          |                     |
|                                              | 55                       | 4.48619717     |                          |                     |
|                                              | 56                       | 4.44177938     |                          |                     |
|                                              | 57                       | 4.37515269     |                          |                     |
|                                              | 58                       | 4.308526       |                          |                     |
|                                              | 59                       | 4.16416817     |                          |                     |
|                                              | 60                       | 4.03091478     |                          |                     |
|                                              | 61                       | 3.88655695     |                          |                     |
|                                              | 62                       | 3.68667688     |                          |                     |
|                                              | 63                       | 3.42239101     |                          |                     |

|                   |                                                            |            |                                 |  |
|-------------------|------------------------------------------------------------|------------|---------------------------------|--|
|                   | 64                                                         | 3.16476781 |                                 |  |
|                   | 65                                                         | 2.81497768 |                                 |  |
|                   | 66                                                         | 2.36524752 |                                 |  |
|                   | 67                                                         | 1.99880072 |                                 |  |
|                   | 68                                                         | 1.55462278 |                                 |  |
|                   | 69                                                         | 1.27701157 |                                 |  |
|                   | 70                                                         | 0.98829591 |                                 |  |
|                   | 71                                                         | 0.85504253 |                                 |  |
|                   | 72                                                         | 0.76620694 |                                 |  |
|                   | 73                                                         | 0.6884758  |                                 |  |
|                   | 74                                                         | 0.62184911 |                                 |  |
|                   | 75                                                         | 0.58853577 |                                 |  |
|                   | 76                                                         | 0.55522242 |                                 |  |
|                   | 77                                                         | 0.52190908 |                                 |  |
|                   | 78                                                         | 0.48859573 |                                 |  |
|                   | 79                                                         | 0.47749128 |                                 |  |
|                   | 80                                                         | 0.44417794 |                                 |  |
|                   | 81                                                         | 0.42196904 |                                 |  |
|                   | 82                                                         | 0.39976014 |                                 |  |
|                   | 83                                                         | 0.37755125 |                                 |  |
|                   | 84                                                         | 0.35534235 |                                 |  |
|                   | 85                                                         | 0.322029   |                                 |  |
|                   | 86                                                         | 0.29982011 |                                 |  |
|                   | 87                                                         | 0.26650676 |                                 |  |
|                   | 88                                                         | 0.22208897 |                                 |  |
|                   | 89                                                         | 0.16656673 |                                 |  |
|                   | 90                                                         | 0.08883559 |                                 |  |
|                   | 91                                                         | 0.04441779 |                                 |  |
|                   | 92                                                         | 0.0222089  |                                 |  |
|                   | 93                                                         | 0.01110445 |                                 |  |
|                   | 94                                                         | 0.00555222 |                                 |  |
|                   | 95                                                         | 0.00111044 |                                 |  |
| Optical constants | This study                                                 |            | Khare et al. 1984 <sup>14</sup> |  |
| Mass load         | ~25 particle/cm <sup>3</sup>                               |            |                                 |  |
| Vertical profile  | Isobaric haze layer from a pressure of 0.1 bar to 0.1 μbar |            |                                 |  |

**Supplementary Table 3.** The fringe spacings observed in the variable angle reflectance spectra of haze analogue films (Supplementary Figure 3) and the  $n_0$  values determined from Eq. 5. from 0.5-1.1  $\mu\text{m}$ .

| Fringe spacing ( $\text{cm}^{-1}$ )  | 400 K film |        | 300 K film |        |
|--------------------------------------|------------|--------|------------|--------|
|                                      | 15 °       | 45 °   | 15 °       | 45 °   |
|                                      | 961        | 1057   | 1480       | 1639   |
|                                      | 966        | 1079   | 1509       | 1646   |
|                                      | 972        | 1068   | 1502       | 1656   |
|                                      | 965        | 1058   | 1489       | 1642   |
|                                      | 976        | 1063   | 1492       | 1632   |
|                                      | 972        | 1079   | 1496       | 1647   |
|                                      | 977        | 1066   |            |        |
|                                      | 985        | 1075   |            |        |
|                                      | 989        |        |            |        |
| Average spacing ( $\text{cm}^{-1}$ ) | 973.7      | 1068.2 | 1494.7     | 1643.7 |
| Standard deviation                   | 6.2        | 8.6    | 10.1       | 8.1    |
| $n_0$ value                          | 1.6213     |        | 1.6027     |        |
| Uncertainty of $n_0$                 | 1.3%       |        | 1.6%       |        |

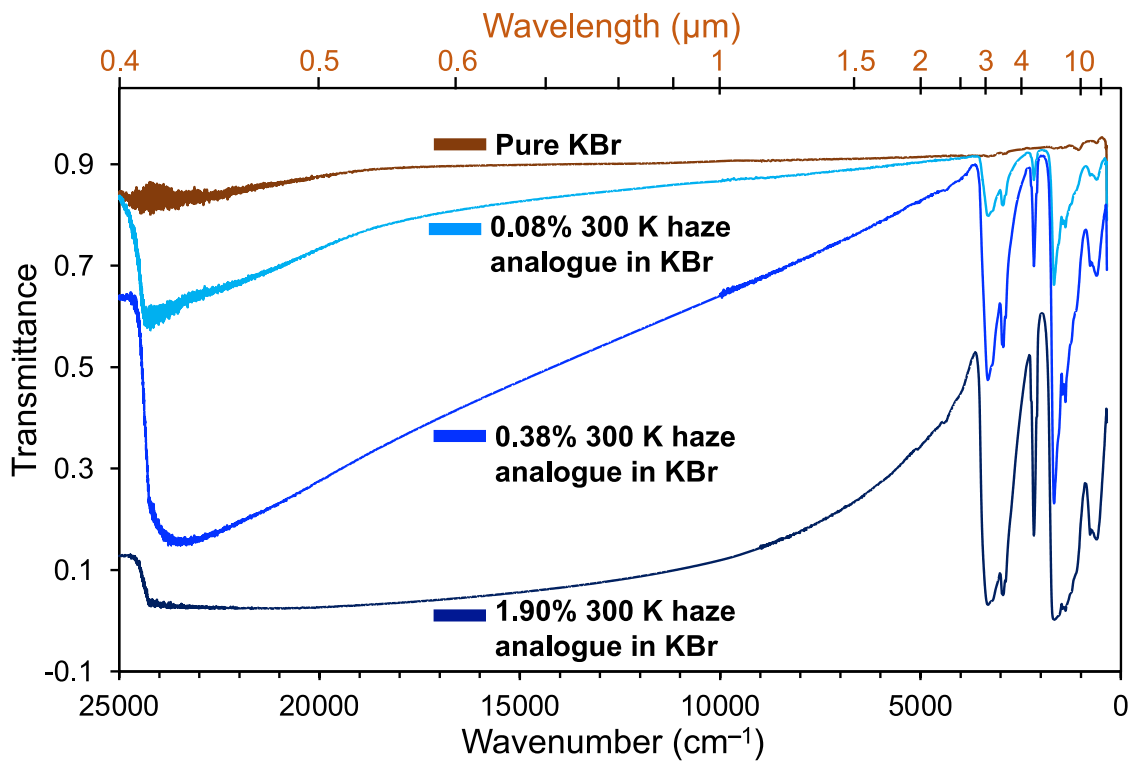

**Supplementary Figure 1.** The transmittance of pure KBr (brown) and the 300 K haze analogue in KBr with different concentrations (lighter blue: 0.08%, blue: 0.38%, darker blue: 1.9%). The spectra are referenced to the vacuum measurement without sample.

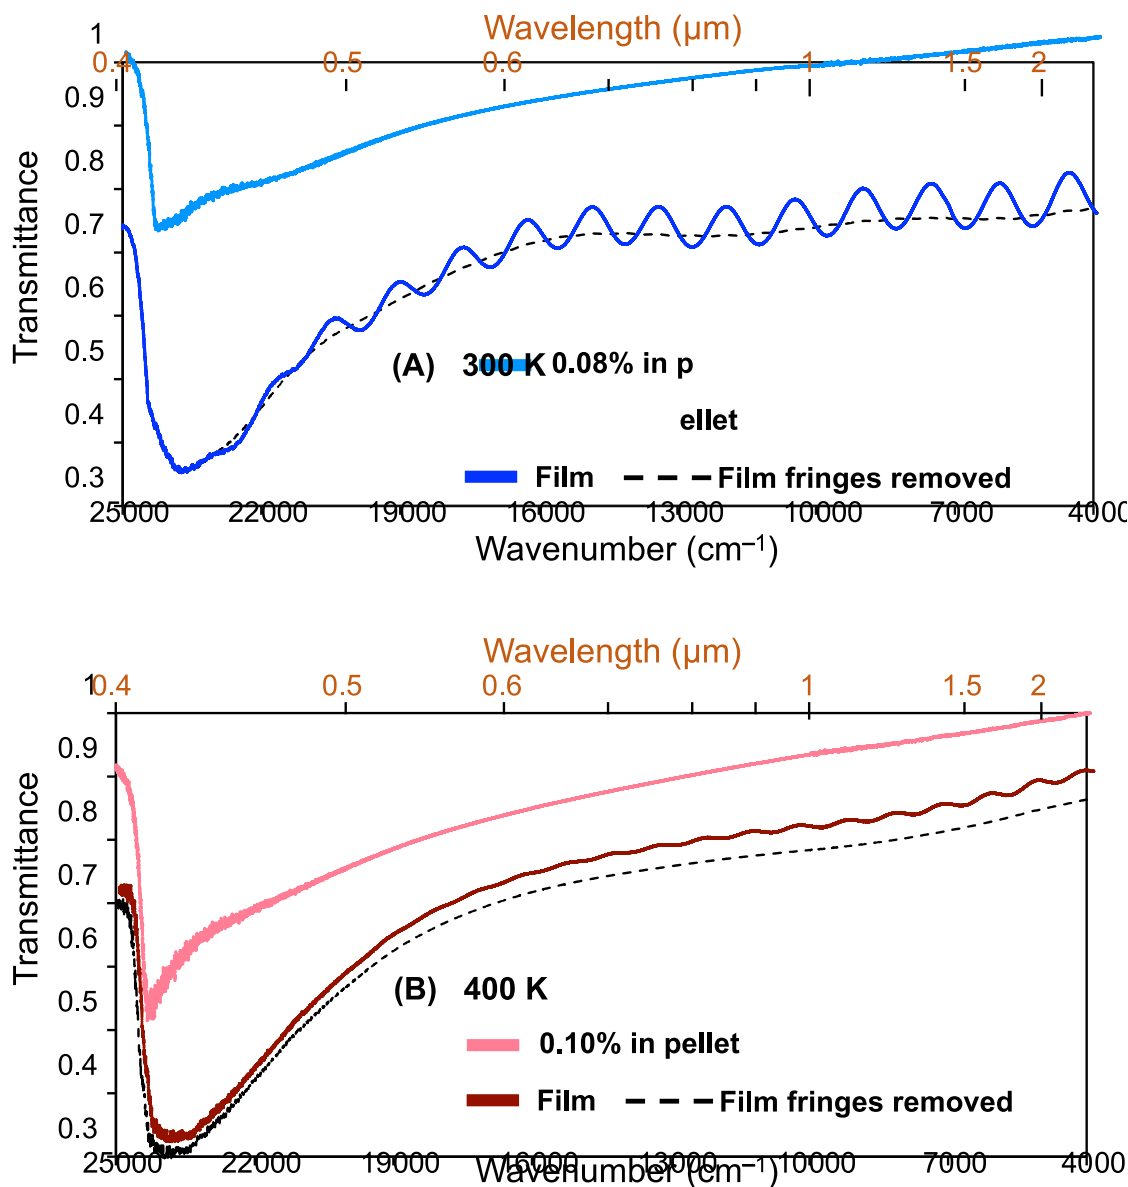

**Supplementary Figure 2.** The transmittance of the 300 K haze analogue (panel A: lighter blue-0.08% powder in KBr pellet, blue-film on quartz substrate) and 400 K haze analogue (panel B: lighter red-0.10% powder in KBr pellet, red-film on quartz substrate) from 4000 to 25000 cm<sup>-1</sup> (or from 0.4 to 2.5 μm, the quartz substrate is not transparent beyond 2.5 μm, limiting the transmittance measurements of the films in the longer wavelengths). The dashed lines are the transmittance of the films with the fringes removed. The film samples and the powder samples have similar spectral trends in this wavelength range.



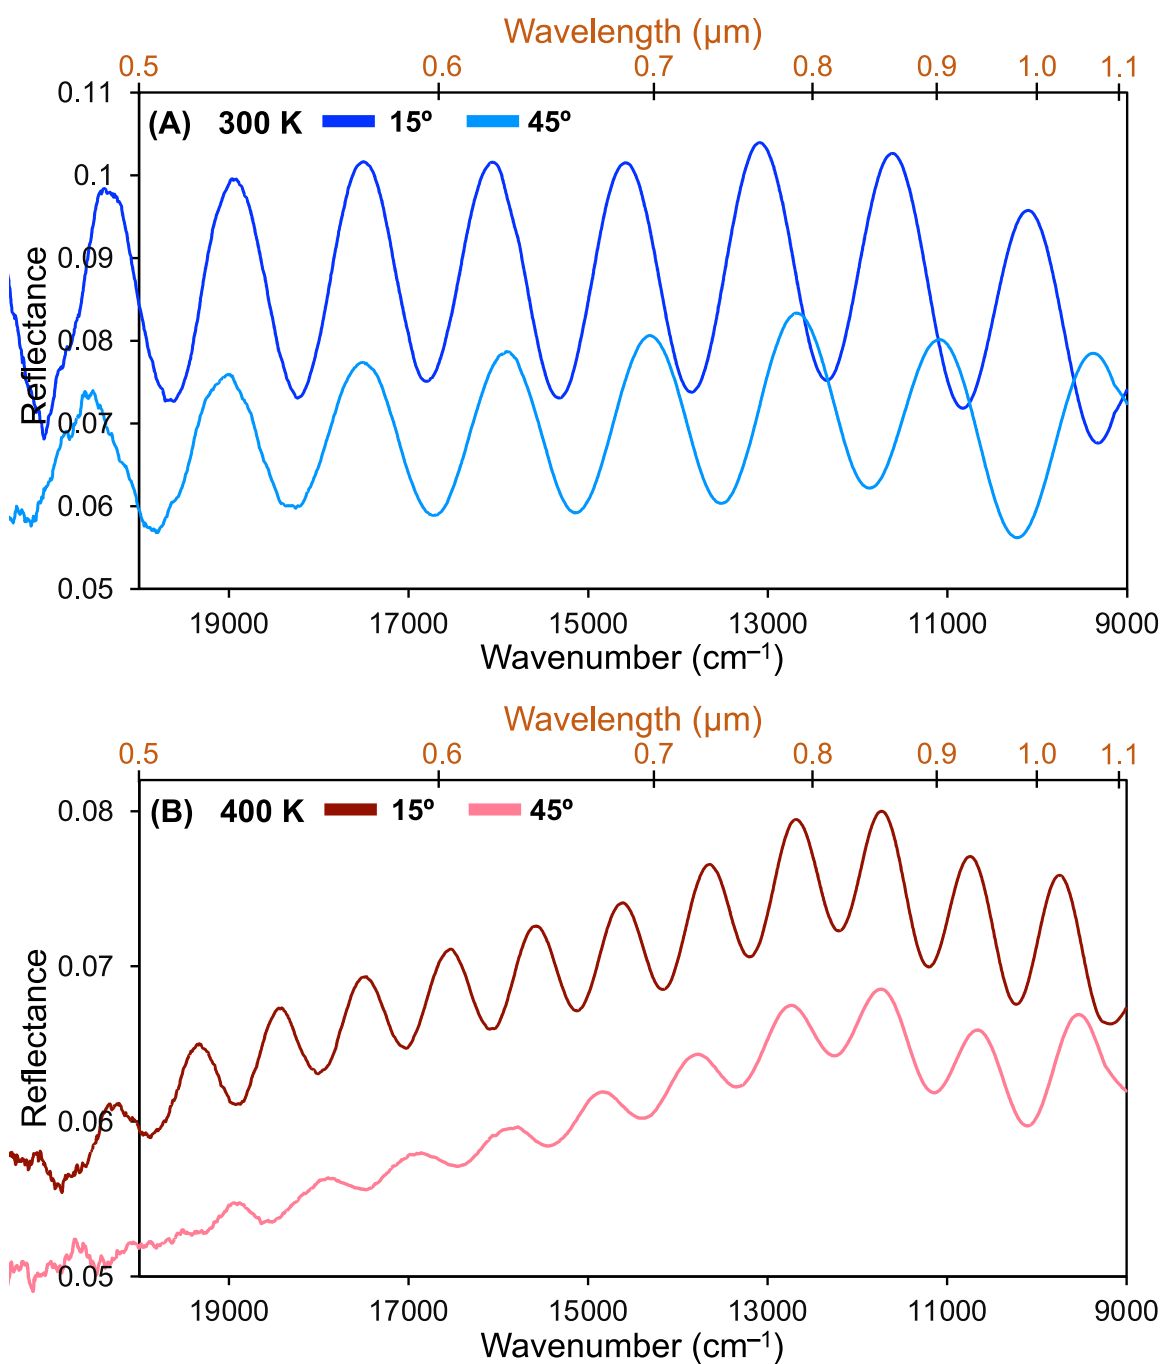

**Supplementary Figure 3.** Reflectance spectra of two exoplanet haze analogues formed in water-rich gas mixtures at 300 K (A) and 400 K (B). Using Seagull Variable Angle Reflection Accessory, we measure the reflectance of each haze analogue film at two different angles of incidence, 15° (darker shade) and 45° (lighter shade). The spectra from 20000 to 9000  $\text{cm}^{-1}$  (0.5 to 1.1  $\mu\text{m}$ ) are shown here. From the interference fringes on the reflectance spectra at two different angles, the  $n_0$  values of the samples at corresponding wavelengths can be determined using Eq. 5.

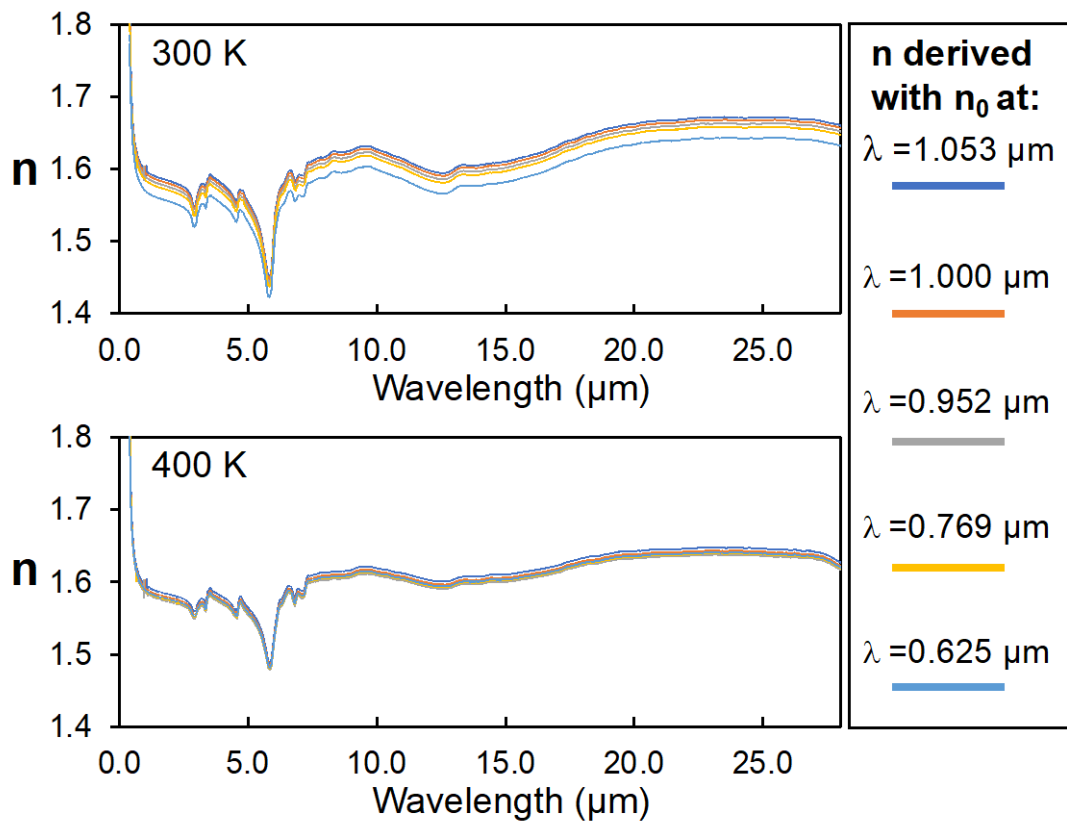

**Supplementary Figure 4.** The real refractive index ( $n$ ) for the 300 K (upper panel) and 400 K (lower panel) haze analogues derived from Eq. 6 with anchor points ( $n_0=1.6213$  for 400 K sample,  $n_0=1.6027$  for 300 K sample) at different wavelengths ( $\lambda$ ). The yielded  $n$  values for each sample are very close (the relative standard deviation is less than 2%) when different anchor points are used.

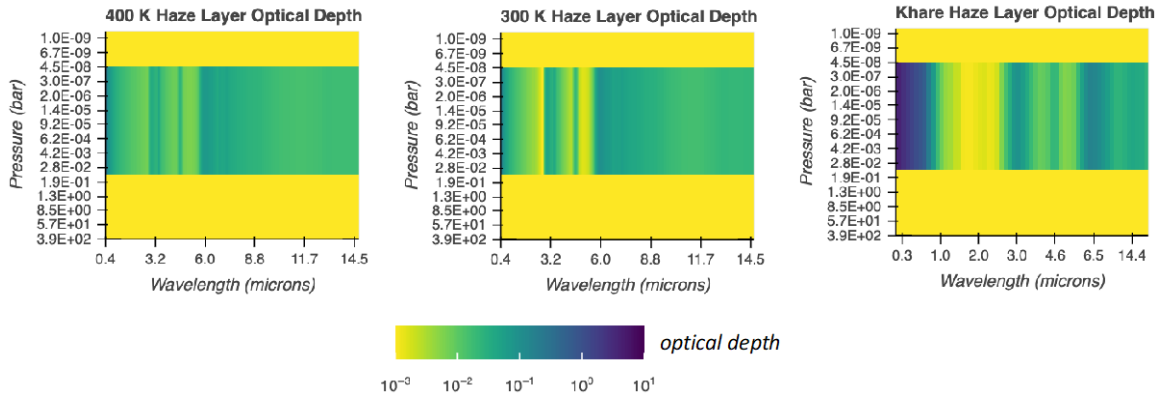

**Supplementary Figure 5.** Modeled haze slab profiles as a function of pressure and wavelength as implemented with the *Virga*-derived Mie coefficients. The color bar indicates the optical depth at each wavelength, with darker shading corresponding to higher optical depths. The haze layer extends from 0.1 bar to 0.1  $\mu$ bar with a haze particle radii distribution centered around 25 nm. Note that the Khare et al. (1984) data has wider wavelength coverage than shown, but at lower resolution than our measured optical properties.

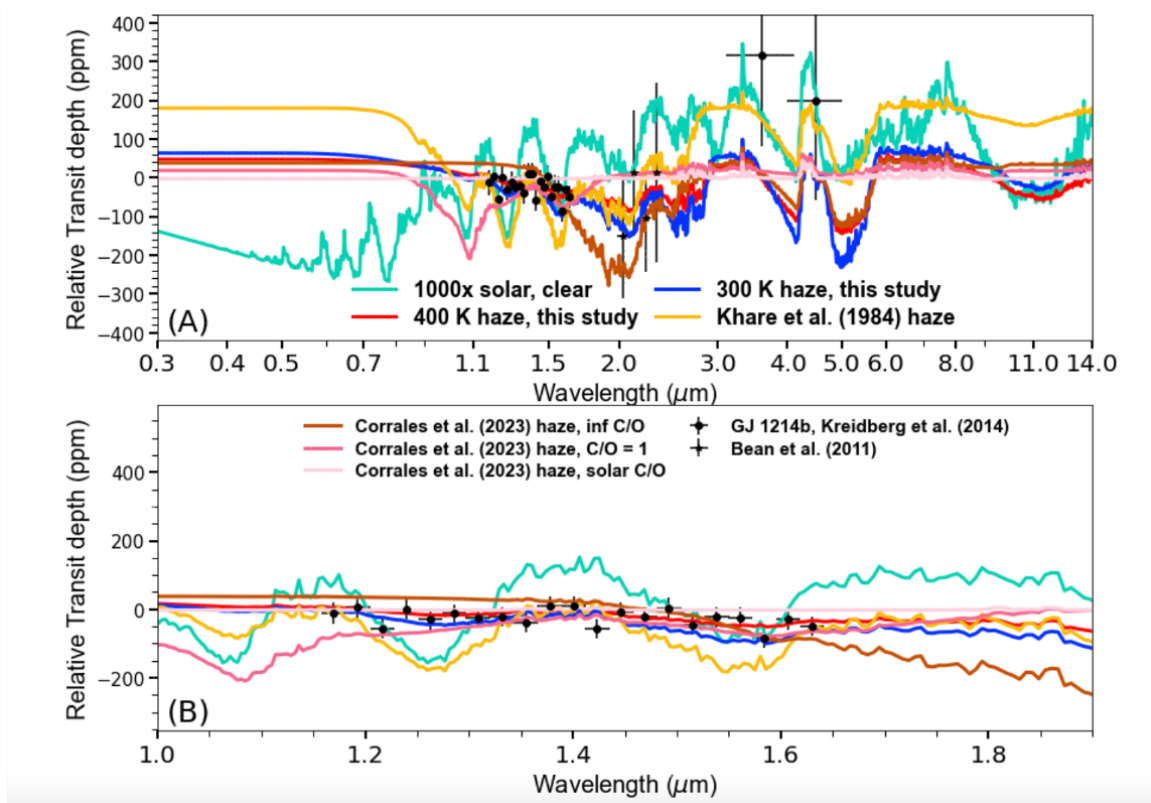

**Supplementary Figure 6.** Model spectra of a water-rich atmosphere around a GJ 1214 b-like planet. Here we add the synthetic spectra using the optical constants reported by Corrales et al. (2023)<sup>53</sup> to show the effect of different haze optical properties. The method and settings for generating the spectra here are the same as described in 4.5. Compared to our water-rich atmospheric haze analogues and Khare Titan haze analogue, the haze analogues from Corrales et al. (2023)<sup>53</sup> more heavily mute the atmospheric spectral features in the longer wavelengths (2.5 to 14  $\mu\text{m}$ ). In the short wavelengths, the haze analogues from Corrales et al. (2023)<sup>53</sup> mute the atmospheric features at similar level as our water-rich atmospheric haze analogues. The error bars for the observed data from Kreidberg et al. (2014)<sup>1</sup> and Bean et al. (2011) correspond to  $1\sigma$  uncertainties.
